# Supplementary material for: Improving the Safety and Continuity Of Medicines management at Transitions of care (ISCOMAT): protocol for a process evaluation of a cluster randomised control trial
Source: PubMed Central journal article supplement (PMC7689064; doi:10.1136/bmjopen-2020-040493), 2020-11-24
Supplement: bmjopen-2020-040493.draft_revisions.pdf [file bmjopen-2020-040493.draft_revisions.pdf]

# BMJ Open

BMJ Open is committed to open peer review. As part of this commitment we make the peer review history of every article we publish publicly available.

When an article is published we post the peer reviewers' comments and the authors' responses online. We also post the versions of the paper that were used during peer review. These are the versions that the peer review comments apply to.

The versions of the paper that follow are the versions that were submitted during the peer review process. They are not the versions of record or the final published versions. They should not be cited or distributed as the published version of this manuscript.

BMJ Open is an open access journal and the full, final, typeset and author-corrected version of record of the manuscript is available on our site with no access controls, subscription charges or pay-per-view fees (<http://bmjopen.bmj.com>).

If you have any questions on BMJ Open's open peer review process please email [info.bmjopen@bmj.com](mailto:info.bmjopen@bmj.com)

# BMJ Open

## Improving the Safety and Continuity Of Medicines management at Transitions of care (ISCOMAT): protocol for a process evaluation of a cluster randomised control trial

|                               |                                                                                                                                                                                                                                                                                                                                                                                                                                                                                                                                                                                                                                                                                                                                                                                                                                                                                                                                                                                                                                                                                                                                                                                                                      |
|-------------------------------|----------------------------------------------------------------------------------------------------------------------------------------------------------------------------------------------------------------------------------------------------------------------------------------------------------------------------------------------------------------------------------------------------------------------------------------------------------------------------------------------------------------------------------------------------------------------------------------------------------------------------------------------------------------------------------------------------------------------------------------------------------------------------------------------------------------------------------------------------------------------------------------------------------------------------------------------------------------------------------------------------------------------------------------------------------------------------------------------------------------------------------------------------------------------------------------------------------------------|
| Journal:                      | <i>BMJ Open</i>                                                                                                                                                                                                                                                                                                                                                                                                                                                                                                                                                                                                                                                                                                                                                                                                                                                                                                                                                                                                                                                                                                                                                                                                      |
| Manuscript ID                 | bmjopen-2020-040493                                                                                                                                                                                                                                                                                                                                                                                                                                                                                                                                                                                                                                                                                                                                                                                                                                                                                                                                                                                                                                                                                                                                                                                                  |
| Article Type:                 | Protocol                                                                                                                                                                                                                                                                                                                                                                                                                                                                                                                                                                                                                                                                                                                                                                                                                                                                                                                                                                                                                                                                                                                                                                                                             |
| Date Submitted by the Author: | 14-May-2020                                                                                                                                                                                                                                                                                                                                                                                                                                                                                                                                                                                                                                                                                                                                                                                                                                                                                                                                                                                                                                                                                                                                                                                                          |
| Complete List of Authors:     | <p>Powell, Catherine; University of Bradford Faculty of Life Sciences, School of Pharmacy and Medical Sciences</p> <p>Breen, Liz; University of Bradford Faculty of Life Sciences, School of Pharmacy and Medical Sciences; Bradford Institute for Health Research, Yorkshire and Humber Patient Safety Translational Research Centre</p> <p>Fylan, Beth; University of Bradford Faculty of Life Sciences, School of Pharmacy and Medical Sciences; Bradford Institute for Health Research, Yorkshire and Humber Patient Safety Translational Research Centre</p> <p>Ismail, Hanif; University of Bradford Faculty of Life Sciences, School of Pharmacy and Medical Sciences</p> <p>Alderson, Sarah; University of Leeds School of Medicine</p> <p>Gale, Chris; University of Leeds, Leeds Institute of Cardiovascular and Metabolic Medicine</p> <p>Gardner, Peter; University of Bradford Faculty of Life Sciences, School of Pharmacy and Life Sciences</p> <p>Farrin, Amanda; University of Leeds, Clinical Trials Research Unit</p> <p>Allred, David ; University of Leeds, School of Healthcare; Bradford Institute for Health Research, Yorkshire and Humber Patient Safety Translational Research Centre</p> |
| Keywords:                     | Heart failure < CARDIOLOGY, CARDIOLOGY, Clinical trials < THERAPEUTICS, STATISTICS & RESEARCH METHODS                                                                                                                                                                                                                                                                                                                                                                                                                                                                                                                                                                                                                                                                                                                                                                                                                                                                                                                                                                                                                                                                                                                |
|                               |                                                                                                                                                                                                                                                                                                                                                                                                                                                                                                                                                                                                                                                                                                                                                                                                                                                                                                                                                                                                                                                                                                                                                                                                                      |

SCHOLARONE™  
Manuscripts

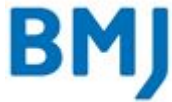

I, the Submitting Author has the right to grant and does grant on behalf of all authors of the Work (as defined in the below author licence), an exclusive licence and/or a non-exclusive licence for contributions from authors who are: i) UK Crown employees; ii) where BMJ has agreed a CC-BY licence shall apply, and/or iii) in accordance with the terms applicable for US Federal Government officers or employees acting as part of their official duties; on a worldwide, perpetual, irrevocable, royalty-free basis to BMJ Publishing Group Ltd ("BMJ") its licensees and where the relevant Journal is co-owned by BMJ to the co-owners of the Journal, to publish the Work in this journal and any other BMJ products and to exploit all rights, as set out in our [licence](#).

The Submitting Author accepts and understands that any supply made under these terms is made by BMJ to the Submitting Author unless you are acting as an employee on behalf of your employer or a postgraduate student of an affiliated institution which is paying any applicable article publishing charge ("APC") for Open Access articles. Where the Submitting Author wishes to make the Work available on an Open Access basis (and intends to pay the relevant APC), the terms of reuse of such Open Access shall be governed by a Creative Commons licence – details of these licences and which [Creative Commons](#) licence will apply to this Work are set out in our licence referred to above.

Other than as permitted in any relevant BMJ Author's Self Archiving Policies, I confirm this Work has not been accepted for publication elsewhere, is not being considered for publication elsewhere and does not duplicate material already published. I confirm all authors consent to publication of this Work and authorise the granting of this licence.

1  
2  
3  
4  
5  
6  
7  
8  
9

## Improving the Safety and Continuity Of Medicines management at Transitions of care (ISCOMAT): protocol for a process evaluation of a cluster randomised control trial

10  
11

### Corresponding author

12 Dr Catherine Powell

13 Room M24

14 Richmond Building

15 School of Pharmacy and Medical Sciences,

16 University of Bradford,

17 Richmond Rd, Bradford BD7 1DP, UK

18 c.powell2@bradford.ac.uk

19 01274 236338

20  
21  
22  
23  
24  
25  
26  
27

### Authors

28 Dr Catherine Powell, School of Pharmacy and Medical Sciences, University of Bradford, Richmond  
29 Road, Bradford, BD7 1DP, UK. <https://orcid.org/0000-0001-7590-0247>

30 Dr Liz Breen, School of Pharmacy and Medical Sciences, University of Bradford, Richmond Road,  
31 Bradford, BD7 1DP, UK. Yorkshire and Humber Patient Safety Translational Research Centre.  
32 Bradford Institute for Health Research, Temple Bank House, Bradford, BD9 6RJ Bradford Institute  
33 for Health Research, Bradford, UK. <https://orcid.org/0000-0001-5204-1187>

34 Dr Beth Fylan, School of Pharmacy and Medical Sciences, University of Bradford, Richmond Road,  
35 Bradford, BD7 1DP, UK. Yorkshire and Humber Patient Safety Translational Research Centre.  
36 Bradford Institute for Health Research, Temple Bank House, Bradford, BD9 6RJ, UK.  
37 <https://orcid.org/0000-0003-0599-4537>

38 Dr Hanif Ismail, School of Pharmacy and Medical Sciences, University of Bradford, Richmond Road,  
39 Bradford, BD7 1DP, UK. <https://orcid.org/0000-0002-7885-6648>

40 Dr Sarah Alderson, School of Medicine, Worsley Building, University of Leeds, Leeds LS2 9JT, UK.  
41 <https://orcid.org/0000-0002-5418-0495>

42 Professor Chris P Gale, Leeds Institute of Cardiovascular and Metabolic Medicine, University of  
43 Leeds, Leeds, UK. <https://orcid.org/0000-0003-4732-382X>

44 Professor Peter Gardner, School of Pharmacy and Medical Sciences, University of Bradford,  
45 Richmond Road, Bradford, BD7 1DP, UK. <https://orcid.org/0000-0002-8799-0443>

46 Professor Amanda J Farrin, Clinical Trials Research Unit, Leeds Institute of Clinical Trials Research,  
47 University of Leeds, Leeds, LS2 9JT, UK. <http://orcid.org/0000-0002-2876-0584>

48 Professor David P Alldred, University of Leeds, School of Healthcare, Baines Wing, Leeds LS2 9DA,  
49 UK. Yorkshire and Humber Patient Safety Translational Research Centre. Bradford Institute for  
50

1  
2  
3 Health Research, Temple Bank House, Bradford, BD9 6RJ, UK. <https://orcid.org/0000-0002-2525-4854>  
4  
5

6 **Word count (excluding title page, abstract, references, figures and tables):** 3614  
7

8 **Key words:** Heart failure, Cardiology, Clinical trials, Statistics and Research Methods  
9

## 10 11 **ABSTRACT**

12  
13  
14 **Introduction:** A key priority for the UK National Health Service (NHS) and patients is to ensure  
15 that medicines are used safely and effectively. However, medication changes are not always optimally  
16 communicated and implemented when patients transfer from hospital into community settings. Heart  
17 failure is a common reason for admission to hospital. Patients with heart failure have a high burden of  
18 morbidity, mortality and complex pharmacotherapeutic regimes. The Improving the Safety and  
19 Continuity Of Medicines management at Transitions of care (ISCOMAT) programme comprises a  
20 cluster randomised controlled trial which will test the effectiveness of a complex behavioural  
21 intervention aimed at improving medications management at the interface between hospitals discharge  
22 and community care. We will conduct a rigorous process evaluation to inform interpretation of the  
23 trial findings, inform implementation of the intervention on a wider scale and aid dissemination of the  
24 intervention.  
25  
26  
27  
28  
29  
30  
31  
32

33 **Methods and analysis:** The process evaluation will be conducted in six purposively selected  
34 intervention sites (i.e. hospital trusts and associated community pharmacies) using a mixed-methods  
35 design. Fidelity and barriers/enablers of implementation of the Medicines at Transitions Intervention  
36 (MaTI) will be explored using observation, interviews (20 patients, 40 healthcare professionals),  
37 surveys and routine trial data collection on adherence to MaTI. A parallel mixed analysis will be  
38 applied. Qualitative data will be thematically analysed using Framework analysis and survey data will  
39 be analysed descriptively. Data will be synthesised, triangulated and mapped to the Consolidated  
40 Framework for Implementation Research (CFIR) where appropriate. The process evaluation  
41 commenced on June 2018 and is due to end on February 2021.  
42  
43  
44  
45  
46  
47

48 **Ethics and dissemination:** Approved by Research Ethics Committee and the UK Health  
49 Research Authority REC: 18/YH/0017 / IRAS: 231431. Findings will be disseminated via academic  
50 and policy conferences, peer-reviewed publications and social media.  
51  
52  
53

54 **Trial registration number:** ISRCTN: 66212970/  
55  
56  
57  
58  
59  
60

## ARTICLE SUMMARY

### Strengths and limitations of this study

- An evaluation of a cluster randomised controlled trial of a complex behavioural intervention for a high priority healthcare issue.
- Views of patients and health professionals working across both primary and secondary care.
- A key strength is our mixed methods and the flexibility of our approach in light of emerging issues from the study and the shifts in healthcare practice and policy.
- The process evaluation is limited to six purposively selected intervention sites.

### INTRODUCTION

Heart failure presents a major challenge to healthcare systems globally.[1] In the UK it is thought to affect the lives of over 920,000 people.[2] In a study of four million individuals, heart failure cases have been found to increase 12% from 2002 to 2014.[3] Myocardial infarction has been identified as a risk for heart failure.[4] Heart failure is treated by a combination of medication, lifestyle changes and interventional surgery depending on the severity of the condition. Typically, the pharmacological treatment pathway involves a combination of medicines that are titrated to the optimal level that patients can tolerate. If not managed well (or if the patient has not been diagnosed and treated in primary care) they may be admitted to hospital for treatment and to be stabilised. Approximately 5% of all emergency hospital admissions are for heart failure.[5] Ongoing treatment plans following discharge from hospital may not be fully implemented due to failures in communication between healthcare providers or a lack of specialist staff in the community.[6, 7] Patients may not understand their medicines, what they are for and why they need to take them because, for example, medical language may create a gap in patients' understanding.[8] Patients may therefore deteriorate, which can result in a re-admission to hospital or death.[9]

### The ISCOMAT study

ISCOMAT is a five-year National Institute for Health Research (NIHR) funded research programme, which aims to optimise the way heart failure patients are supported with their medicines when they move from hospital to home. This may contribute to improving patients' health through helping them better understand and use their medicines. ISCOMAT also aims to improve the way health professionals work together in order to improve communication and optimise medicines use when patients return home. Similar international studies have examined patient-centred care transitions for patients hospitalized for heart failure and found clinical outcomes did not improve. ISCOMAT is designed for the UK health system and may show improvements in clinical outcomes in this setting.[10] In earlier work packages, we explored the resilience of the medicines management

1  
2  
3 pathway for heart failure and then used Experienced Based Co-Design to develop the Medicines at  
4 Transitions Intervention (MaTI) with patients and professionals.[8, 11] The MaTI was designed to  
5 make best use of medicines and reduce harm through: the provision of information to the patient;  
6 enhanced communication between hospital and the patient's community pharmacist; and increased  
7 engagement of the community pharmacist post discharge. We have provided limited information  
8 about the intervention here to avoid potential contamination of the ongoing trial. A more detailed  
9 description of the MaTI intervention will be published alongside feasibility testing. The cluster  
10 randomised controlled trial is testing the effectiveness of the MaTI and will recruit an average of 50  
11 patients over approximately 12 months from cardiology ward(s) in 42 acute NHS trusts across  
12 England (target n=2100 patients). Sites are randomised to either treatment as usual or to the MaTI. A  
13 site co-ordinator is responsible for organising the trial and implementation of the MaTI at each site.  
14  
15  
16  
17  
18  
19  
20

## 21 **The process evaluation**

22  
23 Process evaluations are increasingly carried out alongside randomised controlled trials.[12, 13] They  
24 are particularly well suited to trials of complex interventions in multiple sites where the intervention  
25 may be implemented differently throughout sites and help us to understand more about the practical  
26 problems encountered and how they were resolved. We will follow the Medical Research Council  
27 (MRC) recommendations and guidance on process evaluations.[13] The process evaluation will  
28 examine the effect of organisational context and setting on intervention delivery, and how the  
29 intervention is best implemented. There are no predefined methods that a process evaluation must  
30 adopt although they typically involve mixed methods.[14, 15] Although the process and outcomes  
31 evaluation will be conducted by separate teams, the trial and process evaluation teams will meet  
32 regularly to have oversight.  
33  
34  
35  
36  
37  
38

### 39 **Aims and objectives**

40  
41 The aims of the process evaluation are to inform interpretation of the trial findings, inform  
42 implementation of the intervention on a wider scale (for example, other long term conditions) and aid  
43 potential future implementation of the intervention.  
44  
45

46 Our objectives at each of the six process evaluation sites are to:

- 47 • Determine the degree to which the intervention is delivered (internal fidelity)
- 48 • Explore and explain the relationship between intervention implementation and the trial  
49 outcomes
- 50 • Identify barriers and facilitators for the successful implementation and roll out of the  
51 intervention (should the intervention be effective)
- 52
- 53
- 54
- 55
- 56
- 57
- 58
- 59
- 60

## PROCESS EVALUATION METHODS

### Study design

In addition to the aforementioned MRC guidance,[13] we will draw on other relevant literature,[16, 17] in particular the Consolidated Framework for Implementation Research (CFIR).[18] The CFIR is a conceptual framework that was developed to guide systematic assessment of multilevel implementation contexts to identify factors that might influence intervention implementation and effectiveness.[19] The MaTI intervention is implemented at multiple levels at each site including trusts, secondary and primary health care professionals and patients. The CFIR framework generates a knowledge base for implementation across multiple settings within five major domains: intervention characteristics, inner setting, outer setting, individual characteristics, and implementation process. Domains will be explored and additional relevant theoretical frameworks applied as appropriate. We will also draw on human resource management evaluation, specifically the ability, motivation and opportunity (AMO) model,[20, 21] and capability, opportunity, and motivation (COM-B) model.[22] These models are complementary and highlight how policy interventions that require changes in staff behaviour are shaped by their ability to work in different ways, in terms of skills, their level of motivation and their opportunities to change practice.

The study design is a parallel mixed synthesis study using quantitative and qualitative data from six intervention sites. Methods will involve non-participant observations, semi-structured interviews and surveys. In order to capture data on barriers and facilitators to implementation we will collect data from health professionals working along the patient pathway (from both secondary and primary care), patients and community pharmacists. We will also utilise fidelity data on adherence to MaTI that is being collected within each intervention site in the trial. We will explore and explain the relationship between intervention implementation and the trial outcomes in the six process evaluation sites through analysing secondary outcome data. These data will indicate whether the intervention improves patient understanding of their medicines and satisfaction with medicines-related care at two and six weeks post-discharge and twelve months post-registration from the Patient Experience Survey (PES) (a validated item from Coleman's transition measure [23]), alongside observations and implementation data collected as part of the process evaluation. Process evaluations need to be flexible in the context of the ongoing trials they are evaluating and we will record and describe adaptations to this protocol when the findings are published.

### Sampling and recruitment

We aim to purposively sample six intervention sites based on the following criteria:

- University and non-university hospitals



- Method for transferring medicines discharge information to community pharmacists' e.g. electronic system, post, telephone
- Sites located across different geographic areas of England

Within each of the six selected sites we will recruit patients and staff for interviews and surveys. We will also conduct observations at each of these sites. The sampling approach will be iterative and following sampling of one-to-two pilot sites; consideration of the initial data in relation to fidelity will be made.

### Patient interviews

Twenty patients in total will be sampled for interviews (three to four patients across each of the six sites). We will adopt a purposive sampling strategy to meet our target characteristics in terms of gender, age, length of diagnosis, and fidelity to intervention. After piloting, we may need to modify our approach to enable diversity in relation to our sampling criteria. Patients approached will be those that have participated in the trial and received the MaTI intervention.

### Observations of intervention wards

We will seek permission to conduct non-participant observations of staff at ward level (two and a half hours per site). Staff members will be provided with information sheets and a script for informing patients of the researchers' presence. A maximum of two researchers will be present at any one time. Staff will have the opportunity to opt out of the observation. A potential limitation of conducting overt observation is the Hawthorne effect by which individuals being observed may alter their behaviour because they are aware that they are being studied.[24] We will seek to minimise the impact by informing staff that they are being observed and we wish them to behave as normal.[25]

### Hospital staff interviews and surveys

Thirty hospital staff across six sites will be interviewed. Staff members will include those involved in delivering MaTI, such as heart failure specialist nurses, ward pharmacists, pharmacy technicians, cardiology ward nurses and site co-ordinators. We will identify and recruit secondary care staff through a combination of two approaches: (i) we will use information obtained during our ward observations about staff roles in delivering the intervention and approach staff directly; and (ii) we will also liaise with the appointed site co-ordinator to identify staff that are directly involved in the delivery of MaTI.

We will recruit hospital staff for surveys, aiming to recruit as many staff as possible involved in delivering MaTI. We will identify hospital staff with assistance from the site coordinators and seek informed consent from all staff.

## Community pharmacist interviews and surveys

We will identify and recruit ten community pharmacists for interviews. Community pharmacists contacted through nominated pharmacies in each of the six sites will be interviewed. We will identify through the following two methods: the patient checklist forms (collected by the trials unit) containing details of the pharmacy used by patients in the trial; directly contacting and inviting community pharmacists to participate.

Surveys will be undertaken with community pharmacists involved in delivering the intervention. The number of surveys returned will be dependent on the number of differing community pharmacies patients have used as well as return rates. We will identify community pharmacists for surveys through the methods highlighted above for interviews.

## Heart failure nurse surveys

We will recruit two to three community heart failure nurses in each of the six evaluation clusters to complete surveys. Community heart failure nurses will be identified through referrals made to the community heart failure services from the hospitals.

For all interviews and surveys, participants will be provided with an information sheet and informed, written consent will be obtained.

## Data collection

### Patient interviews

Semi-structured interviews with patients will be undertaken in patients' homes three months post-registration into the trial and will last approximately 45 minutes. Interviews, with patients and staff, will be audio recorded and transcribed verbatim. In the first site, patient data will be collected in a block of three to four relatively early in the implementation of the intervention (in the first three months). In subsequent sites, we may sample during middle and late phases of implementation which will be determined based on the data collected. As the trial progresses, we will become more familiar with how the intervention is being implemented. Interview schedules will include a range of questions, probes and prompts and will explore patient experiences of the intervention components.

### Observations of intervention wards

Two researchers (CP/HI) will conduct unstructured and structured observations of clinical staff (heart failure nurses, cardiology nurses, cardiology pharmacists) of adherence to the intervention (content, coverage, frequency and duration). These observations will take place in hospital six months post-registration of the first patient recruited at that site, focusing in-depth on the discharge process and introduction of the MaTI toolkit. Observations will be two and a half hours per site designed to

capture not only delivery of the MaTI (structured) but also to augment our understanding of the hospital ward culture and environment (unstructured). Focused and general observation data will be collected through the use of a designed structured observation tool and field notes.

The focus of the observations will be on the interaction between staff and patients, particularly around the discharge process and completion/use of the toolkit. Other aspects of the intervention e.g. transfer of information, time spent with patients and level of patient understanding will be observed if possible. We will collect quantitative data using structured observations to record actions or behaviours, for example, how information was introduced and provided to patients. The structured observation may pose a greater challenge to collect as it will not be possible to identify in advance when MaTI related activities, such as the introduction of the toolkit, will occur. We will liaise with staff within the site to help us identify suitable times to conduct this structured observation. In the unstructured observations we will seek to develop a more general understanding of the ward culture and the ways the staff interact with patients and each other in the delivery of care. Unstructured data will be collated through field notes.

#### Hospital staff interviews and surveys

Semi-structured interviews with hospital staff will be conducted using an interview schedule covering staff experiences in delivering the intervention. These will take place at the hospital and at the end of site trial implementation i.e. two weeks post-discharge of the last recruited patient to avoid influencing intervention implementation during the trial. Survey data will be collected through paper questionnaires provided to staff when visiting the hospital at the end of site implementation.

#### Community pharmacist interviews and surveys

Community pharmacy semi-structured interviews will focus on how the pharmacists interacted with the enhanced communication from the hospital and how they engaged with patients post-discharge. An interview schedule will be used to collect data on the interventions perceived usability and impact. These will take place at the end of site implementation i.e. two months post-discharge of the last recruited patient. Interviews may take place face to face or via phone. Survey data will be collected through questionnaires to staff via post once the intervention has finished at that site.

#### Heart failure nurse surveys

Heart failure nurses will be invited to complete postal surveys at the end of site implementation. Table 1 illustrates the timing of all data collection.

#### **Table 1**

|                                                             |
|-------------------------------------------------------------|
| <b>Data collection across six process evaluation sites*</b> |
|-------------------------------------------------------------|

| Interview Patient                             | Interview Hospital staff            | Interview Community Pharmacists      | Focused and general observations | Survey hospital staff                                                         | Survey Community Pharmacists                                                     | Survey Community Heart Failure Nurses |
|-----------------------------------------------|-------------------------------------|--------------------------------------|----------------------------------|-------------------------------------------------------------------------------|----------------------------------------------------------------------------------|---------------------------------------|
| 20 in total                                   | 30 in total                         | 10 in total                          | 2.5 hours                        | Sampling frame is all hospital staff involved in delivery of the intervention | Sampling frame is all community pharmacists that have delivered the intervention | 12 approx.                            |
| 3 months post patient registration into trial | 2 weeks post discharge last patient | 2 months post discharge last patient | 6 months post implementation     | 2 weeks post discharge last patient                                           | 2 months post discharge last patient                                             | 2 months post discharge last patient  |

\* Within each site, data collection will be sequential. Across the six sites, data collection will be non-sequential as it will depend on recruitment rates at each site.

## Analysis

The qualitative analysis will be undertaken using a two-step process:

### Step 1 Framework analysis

The process of interpreting the transcripts will take place whilst interviews are still being conducted. This will give the research team the opportunity to explore emerging themes in detail in subsequent interviews. The interviews and unstructured observations will be analysed using the Framework approach, which involves detailed familiarisation with the data, identifying key themes, interpreting the findings within the context of similar research studies, and considering policy and practice.[26] The emerging analysis will be thematic and iterative with regular discussions taking place with the process evaluation team. This involvement will support our interpretation of the interview data. The analysis will be theoretically informed by COM-B[22] and AMO.[20-22]

### Step 2 Consolidated Framework for Implementation Research (CFIR)

Following initial theme generation, we will review the data using the Consolidated Framework for Implementation Research (CFIR).[18] The analysis will involve mapping barriers and facilitators onto domains within CFIR.

Quantitative data will include survey, structured observations and data on adherence to the intervention. The survey data will be entered into secure databases. Descriptive statistics will be employed to analyse survey data. Data relating to adherence to MaTI is being collected from all

1  
2  
3 intervention sites. This consists of checklists detailing which components of the intervention were  
4 implemented for each patient. We will use these data to inform and explain the findings in the process  
5 evaluation sites.  
6  
7

## 8 Additional data 9

10 Where appropriate, we may consider using the additional data (collected for all sites as part of the  
11 wider trial) to inform, explain and triangulate findings with the process evaluation. For example, we  
12 may decide that we need more structured information on completion of the MaTI checklist to consider  
13 alongside our staff interviews and so clarify which steps of the MaTI different staff members carried  
14 out.  
15  
16  
17  
18

19 Additional data sources include:  
20

- 21 • Site Feasibility Questionnaire (initial questions sent to sites to assess their suitability to take  
22 part in the trial covering areas such as clinical pathways, staffing levels/ types of specialist staff,  
23 communication with community pharmacy and the number of patients)  
24
- 25 • Patient Experience Survey (completed by patients at two weeks/ six weeks/ twelve months  
26 post discharge)  
27
- 28 • MaTI checklist completed in the hospital (monitors adherence to the main components of the  
29 intervention)  
30
- 31 • National Heart Failure Audit Data[27] (reports on the characteristics of patients admitted with  
32 acute or sub-acute heart failure, in-hospital investigations and care, treatment given and the discharge  
33 planning and follow-up)  
34
- 35 • Community pharmacy data collection form (describes implementation within community  
36 pharmacy)  
37  
38  
39  
40  
41  
42  
43

44 Analysis will be integrative in order to clarify and explain the predominant systems and their  
45 implications; qualitative and quantitative data will be consolidated through a process of 'parallel  
46 mixed analysis'. [28] This includes an independent analysis of the quantitative and qualitative data to  
47 provide an understanding of key phenomena and the two understandings will be integrated using  
48 meta-inferences. For example, key findings will be generated iteratively, explicitly supported by  
49 quantitative data (such as structured observational and survey data) and substantiated or augmented by  
50 thematic qualitative data (such as interview data and field notes), and vice-versa. Survey data will be  
51 compared across the six clusters to identify any differences in staff perceptions of the barriers and  
52 facilitators to delivery. Analysis will be descriptive.  
53  
54  
55  
56  
57  
58  
59  
60

1  
2  
3 The combined analysis will therefore meet our key aims to inform interpretation of the trial findings,  
4 inform implementation of the intervention on a wider scale (for example, other long-term conditions)  
5 and aid potential future implementation of the intervention. This will be achieved by providing an in  
6 depth understanding of the overall implementation, mechanisms of impact and external factors (infra  
7 structure) that may influence delivery and functioning of the intervention.  
8  
9  
10

### 11 Patient and public involvement

12  
13  
14 The ISCOMAT study has a patient-led steering group that is involved in all stages of the research  
15 process, including the process evaluation. Due to the process evaluation's iterative design we will  
16 regularly consult with the group via meetings and phone/email. The group will continue to be  
17 consulted on the research design, questions, outcome measures and findings. In particular the  
18 members of the group contribute to reviews and evaluations, as well as reading and considering study  
19 and consultation documents from a patient perspective. The group's expertise through their  
20 experiences of living with heart failure will be crucial in understanding patients' experiences with the  
21 MaTI intervention in particular.  
22  
23  
24  
25  
26  
27  
28

## 29 **ETHICS AND DISSEMINATION**

30 The process evaluation has been approved as part of the ISCOMAT trial by the Research Ethics  
31 Committee and the UK Health Research Authority REC: 18/YH/0017 / IRAS: 231431.  
32

33  
34 Findings will be disseminated via academic and policy conferences, peer reviewed publications,  
35 social media e.g. Twitter, with further avenues for dissemination to be agreed upon with our patient  
36 led steering group.  
37  
38  
39  
40

## 41 **CONCLUSION**

42 In this paper we have described the design and methods for the mixed-methods process evaluation of  
43 the NIHR funded ISCOMAT cluster randomised controlled trial which will test the effectiveness of a  
44 complex behavioural intervention aimed at improving medications management at the interface  
45 between hospital and community for patients with hospitalised with heart failure. This process  
46 evaluation protocol demonstrates the importance of process evaluations for understanding outcomes  
47 in the clinical trial, as well as providing guidance for future process evaluations. We have followed  
48 the Medical Research Council (MRC) recommendations and guidance on the delivery of process  
49 evaluation[13] in order to support the standardisation of process evaluations.  
50  
51  
52  
53  
54

### 55 **Acknowledgements**

56  
57  
58  
59  
60

We would like to thank Alison Blenkinsopp, Gerry Armitage, Lauren Moureau, Jan Speechley, the ISCOMAT Patient-led Steering Group, the ISCOMAT Trial Management Group, Trial Steering Committee and the Programme Steering Committee.

### **Competing interests statement**

The authors are not aware of any competing interests.

### **Funding**

This study was supported by the National Institute of Health Research programme Improving the safety and continuity of medicines management at care transitions (ISCOMAT) RP-PG-0514-20009.

### **Disclaimer**

The views expressed are those of the authors and not necessarily those of the NHS, the NIHR or the Department of Health and Social Care.

### **Authors' contributions**

CP, LB, BF, HI, SA, CPG, PG, AF and DPA developed the detail of the process evaluation protocol. CP drafted the manuscript and all authors reviewed it critically for intellectual content and approved the final version submitted for publication.

Our collaborators include members of the wider ISCOMAT Programme Management Team who contributed to previous work packages and the ongoing programme including: Jon Silcock, David K. Raynor, Robert Turner, John Wright, Ian Kellar, Roberta Longo, Ivana Holloway, Chris Bojke, Leeds Clinical Trials Research Unit.

## **REFERENCES**

1. Dewan P, Rørth R, Jhund PS, et al. Income inequality and outcomes in heart failure: a global between-country analysis. *JACC: Heart Failure*. 2019;7(4):336-46.doi:10.1016/j.jchf.2018.11.005
2. British Heart Foundation. UK Factsheet 2020 [Available from: <https://www.bhf.org.uk/what-we-do/our-research/heart-statistics>. Date accessed 14/04/2020
3. Conrad N, Judge A, Tran J, et al. Temporal trends and patterns in heart failure incidence: a population-based study of 4 million individuals. *The Lancet*. 2018;391(10120):572-80.doi:10.1016/S0140-6736(17)32520-5
4. Gho JMIH, Schmidt AF, Pasea L, et al. An electronic health records cohort study on heart failure following myocardial infarction in England: incidence and predictors. *BMJ open*. 2018;8(3):e018331.doi: 10.1136/bmjopen-2017-018331
5. National Institute for Health and Social Care Excellence. Chronic heart failure in adults: diagnosis and management NICE guideline [NG106] 2018 [Available from: <https://www.nice.org.uk/guidance/ng106>. Date accessed 14/04/2020

6. Phipps DL, Morris RL, Blakeman T, et al. What is involved in medicines management across care boundaries? A qualitative study of healthcare practitioners' experiences in the case of acute kidney injury. *BMJ open*. 2017;7(1):e011765.doi: 10.1136/bmjopen-2016-011765
7. Urban R, Paloumpi E, Rana N, et al. Communicating medication changes to community pharmacy post-discharge: the good, the bad, and the improvements. *Int J Clin Phar*. 2013;35(5):813-20.doi: 10.1007/s11096-013-9813-9
8. Fylan B, Marques I, Ismail H, et al. Gaps, traps, bridges and props: a mixed-methods study of resilience in the medicines management system for patients with heart failure at hospital discharge. *BMJ Open*. 2019;9(2):e023440.10.1136/bmjopen-2018-023440
9. Inamdar AA, Inamdar AC. Heart failure: diagnosis, management and utilization. *Journal of clinical medicine*. 2016;5(7):62.doi: 10.3390/jcm5070062
10. Van Spall HGC, Lee SF, Xie F, et al. Effect of patient-centered transitional care services on clinical outcomes in patients hospitalized for heart failure: the PACT-HF randomized clinical trial. *Jama*. 2019;321(8):753-61.doi: 10.1001/jama.2019.0710
11. Raynor DK, Ismail H, Blenkinsopp A, et al. Experience-based co-design—Adapting the method for a researcher-initiated study in a multi-site setting. *Health Expectations*. 2020.doi:<https://doi.org/10.1111/hex.13028>
12. Ellard DR, Taylor SJC, Parsons S, et al. The OPERA trial: a protocol for the process evaluation of a randomised trial of an exercise intervention for older people in residential and nursing accommodation. *Trials*. 2011;12(1):28.doi: 10.1186/1745-6215-12-28
13. Moore GF, Audrey S, Barker M, et al. Process evaluation of complex interventions: Medical Research Council guidance. *British Medical Journal*. 2015;350:h1258.doi:<https://doi.org/10.1136/bmj.h1258>
14. Mann C, Shaw A, Guthrie B, et al. Protocol for a process evaluation of a cluster randomised controlled trial to improve management of multimorbidity in general practice: the 3D study. *BMJ open*. 2016;6(5):e011260.doi:<http://dx.doi.org/10.1136/bmjopen-2016-011260>
15. Grant A, Treweek S, Dreischulte T, et al. Process evaluations for cluster-randomised trials of complex interventions: a proposed framework for design and reporting. *Trials*. 2013;14(1):15.doi:<https://doi.org/10.1186/1745-6215-14-15>
16. Ellard DR, Thorogood M, Underwood M, et al. Whole home exercise intervention for depression in older care home residents (the OPERA study): a process evaluation. *BMC Med*. 2014;12(1):1
17. Sheard L, O'Hara J, Armitage G, et al. Evaluating the PRASE patient safety intervention—a multi-centre, cluster trial with a qualitative process evaluation: study protocol for a randomised controlled trial. *Trials*. 2014;15(1):2282. doi:10.1186/1745-6215-15-420
18. Damschroder L, Aron D, Keith R, SR K, Alexander J, Lowery J. Fostering implementation of health services research findings into practice: a consolidated framework for advancing implementation science. *Implement Sci*. 2009;4:50
19. Keith RE, Crosson JC, O'Malley AS, et al. Using the Consolidated Framework for Implementation Research (CFIR) to produce actionable findings: a rapid-cycle evaluation approach to improving implementation. *Implementation Science*. 2017;12(1):15.doi:10.1186/s13012-017-0550-7
20. Macky K, Boxall P. The relationship between 'high-performance work practices' and employee attitudes: an investigation of additive and interaction effects. *The International Journal of Human Resource Management*. 2007;18(4):537-67.doi:10.1080/09585190601178745
21. Purcell J. Understanding the people and performance link: Unlocking the black box: CIPD Publishing; 2003.
22. Michie S, Van Stralen MM, West R. The behaviour change wheel: a new method for characterising and designing behaviour change interventions. *Implementation science*. 2011;6(1):42
23. Coleman EA, Mahoney E, Parry C. Assessing the quality of preparation for posthospital care from the patient's perspective: the care transitions measure. *Medical care*. 2005;246-55.doi:10.1097/00005650-200503000-00007



- 1  
2  
3 24. Roethlisberger F, Dickson W. Management and the Worker Cambridge, MA: Harvard  
4 University Press; 1939.  
5 25. Campbell JP, Maxey VA, Watson WA. Hawthorne effect: implications for prehospital  
6 research. *Annals of emergency medicine*. 1995;26(5):590-4  
7  
8 26. Ritchie J, Lewis J, Nicholls CM, et al. Qualitative research practice: A guide for social science  
9 students and researchers: Sage; 2013.  
10 27. National Institute for Cardiovascular Outcomes Research (NICOR). National Heart Failure  
11 Audit 2017/18 2017/18 [Available from: [https://www.nicor.org.uk/national-cardiac-audit-  
12 programme/heart-failure-heart-failure-audit/](https://www.nicor.org.uk/national-cardiac-audit-programme/heart-failure-heart-failure-audit/). Date accessed 25/11/2019  
13  
14 28. Creswell JW, Clark VLP. Designing and conducting mixed methods research: Sage  
15 publications; 2017.  
16  
17  
18  
19  
20  
21  
22  
23  
24  
25  
26  
27  
28  
29  
30  
31  
32  
33  
34  
35  
36  
37  
38  
39  
40  
41  
42  
43  
44  
45  
46  
47  
48  
49  
50  
51  
52  
53  
54  
55  
56  
57  
58  
59  
60

For peer review only

1  
2  
3  
4  
5  
6  
7  
8  
9  
10  
11  
12  
13  
14  
15  
16  
17  
18  
19  
20  
21  
22  
23  
24  
25  
26  
27  
28  
29  
30  
31  
32  
33  
34  
35  
36  
37  
38  
39  
40  
41  
42  
43  
44  
45  
46  
47  
48  
49  
50  
51  
52  
53  
54  
55  
56  
57  
58  
59  
60

### Medical Research Council process evaluation checklist[1]

| Checklist                                                                                                                                                   | Response                                           | Where in protocol?                                                              |
|-------------------------------------------------------------------------------------------------------------------------------------------------------------|----------------------------------------------------|---------------------------------------------------------------------------------|
| <b>Working with policy and practice stakeholders</b>                                                                                                        |                                                    |                                                                                 |
| 1. Are there any potential conflicts of interest arising from the relationship between evaluators and policy/practice stakeholders?                         | No                                                 | Page 12                                                                         |
| 2. Have the authors described how they will address these and ensure that the evaluation remains independent?                                               | N/A                                                | N/A                                                                             |
| 3. Does the proposal set out a clear plan for communicating findings to policy and practice stakeholders during the evaluation?                             | Yes                                                | Ethics and dissemination on page 11                                             |
| <b>Relationships between evaluation components</b>                                                                                                          |                                                    |                                                                                 |
| 4. Is the relationship between the process evaluation and other evaluation components clearly defined and justified?                                        | To an extent. More detail to come in results paper | 'The process evaluation' on page 4                                              |
| 5. Will process and outcomes evaluation be conducted by the same team or by separate teams?                                                                 | Separate teams                                     | 'The process evaluation' on page 4                                              |
| 6. If the former, how will researchers ensure that knowledge of outcomes or process does not bias analysis of the other?                                    | N/A                                                | N/A                                                                             |
| 7. If the latter, is there clear oversight of the two components?                                                                                           | Yes                                                | 'Process evaluation' on page 4 (regular meetings)                               |
| 8. Is it clear that the principal investigator values all aspects of the evaluation, and will provide effective oversight of all aspects of the evaluation? | Yes                                                | 'Process evaluation' on page 4 (regular meetings)                               |
| <b>Intervention description and theory</b>                                                                                                                  |                                                    |                                                                                 |
| 9. Is the intended intervention fully described?                                                                                                            | No                                                 | 'Study design' on page 5 indicates that we can only provide limited information |
| 10. Are standardised terminology and definitions of intervention components adopted where possible?                                                         | As above                                           | As above                                                                        |
| 11. Are the structures and processes involved in intervention delivery fully described?                                                                     | As above                                           | As above                                                                        |
| 12. If appropriate, will a full intervention manual be made publicly available?                                                                             | Yes if intervention is successful                  | N/A for protocol paper                                                          |
| 13. Is a clear, plausible, set of causal assumptions specified and justified (for example, in a logic model)?                                               | To be described in a separate paper                | N/A                                                                             |
| 14. Does this draw upon appropriate                                                                                                                         | Yes                                                | Page 5 'Study design' AMO, COM-B                                                |

|                                                                                                                                                                                                                              |     |                                                                                                             |
|------------------------------------------------------------------------------------------------------------------------------------------------------------------------------------------------------------------------------|-----|-------------------------------------------------------------------------------------------------------------|
| theories?                                                                                                                                                                                                                    |     | and CFIR                                                                                                    |
| 15. If not, are there plans to develop a theory as part of the research?                                                                                                                                                     | N/A | N/A                                                                                                         |
| 16. Have the authors planned to review these assumptions with policy and practice stakeholders to explore agreement and divergence on what the intervention is, and how it will work?                                        | Yes | Completed and discussed in another paper                                                                    |
| <b>Process evaluation aims and research questions</b>                                                                                                                                                                        |     |                                                                                                             |
| 17. Are the research questions clear, important and well justified with reference to the theory of the intervention and the status of the evidence base? What decisions will they inform?                                    | Yes | Research questions and objectives on page 4. Justified on page 3 in 'Introduction'.                         |
| 18. Have the authors considered whether previous process evaluations have been conducted of interventions involving similar components or theories of change?                                                                | Yes | Literature highlighted in 'Study design' on page 5                                                          |
| 19. Have they adopted comparable aims and methods, or justified not doing so?                                                                                                                                                | Yes | Methods outlined from page 5                                                                                |
| 20. Has the theory of the intervention (or logic model) been used to identify key areas of uncertainty for investigation by process evaluation?                                                                              | Yes | Yes CFIR AMO and COM-B will be included in data collection and analysis processes as highlighted on page 5  |
| 21. Have the authors considered which components may prove most challenging to implement (e.g. which represent more fundamental change, or for which there is least agreement on what they are and the purposes they serve)? | Yes | Detail to be provided in results paper                                                                      |
| 22. Have the authors considered for which causal assumptions evidence is most equivocal?                                                                                                                                     | Yes | To be reported in results paper                                                                             |
| 23. How will unanticipated consequences be captured?                                                                                                                                                                         | Yes | To be reported in results paper. Changes from protocol will be recorded in a table                          |
| 24. Is there linkage between research aims? Do they fit together to address the overall study aim?                                                                                                                           | Yes | Study aims to be found on page 4                                                                            |
| 25. If conducted alongside an outcomes evaluation, is the added value of the process evaluation explained? Is it clear how the research will enhance the interpretation of outcomes?                                         | Yes | Explained in 'Study design' page 5                                                                          |
| 26. Will process evaluation provide sufficient assurances regarding the internal validity of the outcomes                                                                                                                    | Yes | Examining data from the trial, e.g. Hospital (MaTI) checklist (monitors adherence to the main components of |

|                                                                                                                                                                                                    |                    |                                                                                                                    |
|----------------------------------------------------------------------------------------------------------------------------------------------------------------------------------------------------|--------------------|--------------------------------------------------------------------------------------------------------------------|
| evaluation?                                                                                                                                                                                        |                    | the intervention) Page 10                                                                                          |
| 27. Will it enable policymakers/practitioners to understand how the intervention might be applied in different contexts?                                                                           | N/A protocol paper | To be reported in results paper                                                                                    |
| 28. Have the authors stated how and when they will combine process and outcomes data?                                                                                                              | N/A protocol paper | To be reported in results paper                                                                                    |
| <b>Selection of methods to address research questions</b>                                                                                                                                          |                    |                                                                                                                    |
| 29. Are the quantitative and qualitative methods selected appropriate to the research questions?                                                                                                   | Yes                | Pages 5 to 11 discuss methods used. More detail will be provided in results paper                                  |
| 30. Will implementation be captured in sufficient detail to establish consistency with the theory of the intervention?                                                                             | N/A protocol paper | To be reported in results paper                                                                                    |
| 31. Are existing validated measures used where possible? Are plans to validate new measures included?                                                                                              | Yes                | Page 9 on framework analysis and CFIR                                                                              |
| 32. How will emerging changes, adaptations or additions to the intervention be captured?                                                                                                           | N/A protocol paper | N/A                                                                                                                |
| 33. Are the quantitative methods appropriate? (e.g. 'tick box' self-report by implementers of intervention delivery should be avoided if possible).                                                | Yes                | Page 6-11 we describe quantitative methods                                                                         |
| 34. Are the qualitative methods appropriate?                                                                                                                                                       | Yes                | Pages 6-11 we describe qualitative methods                                                                         |
| 35. Have the authors considered how change in practice as a result of being observed or measured will be minimised?                                                                                | Yes                | Page 6 on hawthorn effect                                                                                          |
| 36. Have the authors considered the timing of data collection, and its impact on the data collected?                                                                                               | Yes                | Page 8-9 on timing of data collection                                                                              |
| 37. Have the authors investigated whether any routine programme monitoring data can be used? If so, are there plans to check their validity and reliability?                                       | Yes                | Interviews will explore routine data such as MaTI checklists to explain if there are poor quality results. Page 11 |
| 38. Have the authors stated how quantitative and qualitative methods will be combined?                                                                                                             | Yes                | Page 10-11 Greater detail will be given in results paper                                                           |
| 39. Have the authors considered how they will respond if challenges emerge during the evaluation - for example, if serious implementation failures are identified which need deeper investigation? | Yes                | We describe possible challenges carrying out observations and how this will be addressed. Page 6                   |
| <b>Resource considerations in collecting/analysing process data</b>                                                                                                                                |                    |                                                                                                                    |
| 40. Who will lead or conduct the process evaluation? Do they have,                                                                                                                                 | Yes                | The lead is named on the paper                                                                                     |

|                                                                                                                                                                                                                                                    |     |                                                                                                                       |
|----------------------------------------------------------------------------------------------------------------------------------------------------------------------------------------------------------------------------------------------------|-----|-----------------------------------------------------------------------------------------------------------------------|
| or have direct access to, appropriate expertise and experience?                                                                                                                                                                                    |     |                                                                                                                       |
| 41. Does the research team have sufficient expertise in quantitative and qualitative methods and relevant social science theory?                                                                                                                   | Yes | N/A                                                                                                                   |
| 42. Is sufficient time, funding and staff resource included for data collection, analysis (including sufficient time to conduct good quality analysis of qualitative data, with quality checks by a second coder where appropriate) and reporting? | Yes | Considered regularly at meetings                                                                                      |
| <b>Analysis and reporting</b>                                                                                                                                                                                                                      |     |                                                                                                                       |
| 43. Has consideration been given to the use of quantitative process measures for modelling variations in outcomes and/or cost-effectiveness?                                                                                                       | Yes | Separate cost evaluation is being conducted                                                                           |
| 44. Is the relationship between qualitative data components and outcomes and/or cost effectiveness analysis clear?                                                                                                                                 | Yes | Relationship between qualitative data and outcomes discussed on page 11. Separate cost evaluation is being conducted. |
| 45. Is there a coherent strategy for dissemination to an academic audience and wider stakeholders?                                                                                                                                                 | Yes | Page 11. Discussed at regular meeting.                                                                                |

1. Moore GF, Audrey S, Barker M, et al. Process evaluation of complex interventions: Medical Research Council guidance. *British Medical Journal*. 2015;350:h1258.doi:https://doi.org/10.1136/bmj.h1258

# BMJ Open

## Improving the Safety and Continuity Of Medicines management at Transitions of care (ISCOMAT): protocol for a process evaluation of a cluster randomised control trial

|                                 |                                                                                                                                                                                                                                                                                                                                                                                                                                                                                                                                                                                                                                                                                                                                                                                                                                                                                                                                                                                                                                                                                                                                                                                                                                                  |
|---------------------------------|--------------------------------------------------------------------------------------------------------------------------------------------------------------------------------------------------------------------------------------------------------------------------------------------------------------------------------------------------------------------------------------------------------------------------------------------------------------------------------------------------------------------------------------------------------------------------------------------------------------------------------------------------------------------------------------------------------------------------------------------------------------------------------------------------------------------------------------------------------------------------------------------------------------------------------------------------------------------------------------------------------------------------------------------------------------------------------------------------------------------------------------------------------------------------------------------------------------------------------------------------|
| Journal:                        | <i>BMJ Open</i>                                                                                                                                                                                                                                                                                                                                                                                                                                                                                                                                                                                                                                                                                                                                                                                                                                                                                                                                                                                                                                                                                                                                                                                                                                  |
| Manuscript ID                   | bmjopen-2020-040493.R1                                                                                                                                                                                                                                                                                                                                                                                                                                                                                                                                                                                                                                                                                                                                                                                                                                                                                                                                                                                                                                                                                                                                                                                                                           |
| Article Type:                   | Protocol                                                                                                                                                                                                                                                                                                                                                                                                                                                                                                                                                                                                                                                                                                                                                                                                                                                                                                                                                                                                                                                                                                                                                                                                                                         |
| Date Submitted by the Author:   | 14-Oct-2020                                                                                                                                                                                                                                                                                                                                                                                                                                                                                                                                                                                                                                                                                                                                                                                                                                                                                                                                                                                                                                                                                                                                                                                                                                      |
| Complete List of Authors:       | <p>Powell, Catherine; University of Bradford Faculty of Life Sciences, School of Pharmacy and Medical Sciences; Wolfson Centre for Applied Health Research</p> <p>Breen, Liz; University of Bradford Faculty of Life Sciences, School of Pharmacy and Medical Sciences; NIHR Yorkshire and Humber Patient Safety Translational Research Centre</p> <p>Fylan, Beth; University of Bradford Faculty of Life Sciences, School of Pharmacy and Medical Sciences; NIHR Yorkshire and Humber Patient Safety Translational Research Centre</p> <p>Ismail, Hanif; University of Bradford Faculty of Life Sciences, School of Pharmacy and Medical Sciences; Wolfson Centre for Applied Health Research</p> <p>Alderson, Sarah; University of Leeds School of Medicine</p> <p>Gale, Chris; University of Leeds, Leeds Institute of Cardiovascular and Metabolic Medicine</p> <p>Gardner, Peter; University of Bradford Faculty of Life Sciences, School of Pharmacy and Life Sciences; Wolfson Centre for Applied Health Research</p> <p>Farrin, Amanda; University of Leeds, Clinical Trials Research Unit</p> <p>Alldred, David ; University of Leeds, School of Healthcare; NIHR Yorkshire and Humber Patient Safety Translational Research Centre</p> |
| <b>Primary Subject Heading</b>: | Cardiovascular medicine                                                                                                                                                                                                                                                                                                                                                                                                                                                                                                                                                                                                                                                                                                                                                                                                                                                                                                                                                                                                                                                                                                                                                                                                                          |
| Secondary Subject Heading:      | Research methods                                                                                                                                                                                                                                                                                                                                                                                                                                                                                                                                                                                                                                                                                                                                                                                                                                                                                                                                                                                                                                                                                                                                                                                                                                 |
| Keywords:                       | Heart failure < CARDIOLOGY, CARDIOLOGY, Clinical trials < THERAPEUTICS, STATISTICS & RESEARCH METHODS                                                                                                                                                                                                                                                                                                                                                                                                                                                                                                                                                                                                                                                                                                                                                                                                                                                                                                                                                                                                                                                                                                                                            |
|                                 |                                                                                                                                                                                                                                                                                                                                                                                                                                                                                                                                                                                                                                                                                                                                                                                                                                                                                                                                                                                                                                                                                                                                                                                                                                                  |

SCHOLARONE™  
Manuscripts



I, the Submitting Author has the right to grant and does grant on behalf of all authors of the Work (as defined in the below author licence), an exclusive licence and/or a non-exclusive licence for contributions from authors who are: i) UK Crown employees; ii) where BMJ has agreed a CC-BY licence shall apply, and/or iii) in accordance with the terms applicable for US Federal Government officers or employees acting as part of their official duties; on a worldwide, perpetual, irrevocable, royalty-free basis to BMJ Publishing Group Ltd ("BMJ") its licensees and where the relevant Journal is co-owned by BMJ to the co-owners of the Journal, to publish the Work in this journal and any other BMJ products and to exploit all rights, as set out in our [licence](#).

The Submitting Author accepts and understands that any supply made under these terms is made by BMJ to the Submitting Author unless you are acting as an employee on behalf of your employer or a postgraduate student of an affiliated institution which is paying any applicable article publishing charge ("APC") for Open Access articles. Where the Submitting Author wishes to make the Work available on an Open Access basis (and intends to pay the relevant APC), the terms of reuse of such Open Access shall be governed by a Creative Commons licence – details of these licences and which [Creative Commons](#) licence will apply to this Work are set out in our licence referred to above.

Other than as permitted in any relevant BMJ Author's Self Archiving Policies, I confirm this Work has not been accepted for publication elsewhere, is not being considered for publication elsewhere and does not duplicate material already published. I confirm all authors consent to publication of this Work and authorise the granting of this licence.

1  
2  
3  
4  
5  
6  
7  
8  
9

## Improving the Safety and Continuity Of Medicines management at Transitions of care (ISCOMAT): protocol for a process evaluation of a cluster randomised control trial

10  
11

### Corresponding author

12 Dr Catherine Powell

13 Room M24

14 Richmond Building

15 School of Pharmacy and Medical Sciences,

16 University of Bradford,

17 Richmond Rd, Bradford BD7 1DP, UK

18 c.powell2@bradford.ac.uk

19 01274 236338

20  
21  
22  
23  
24  
25  
26  
27  
28

### Authors

29 Dr Catherine Powell, School of Pharmacy and Medical Sciences, University of Bradford, Richmond  
30 Road, Bradford, BD7 1DP, UK. Wolfson Centre for Applied Health Research, Bradford, UK.  
31 <https://orcid.org/0000-0001-7590-0247>

32 Dr Liz Breen, School of Pharmacy and Medical Sciences, University of Bradford, Richmond Road,  
33 Bradford, BD7 1DP, UK. NIHR Yorkshire and Humber Patient Safety Translational Research Centre.  
34 Bradford Institute for Health Research, Temple Bank House, Bradford, BD9 6RJ. Wolfson Centre for  
35 Applied Health Research, Bradford, UK. <https://orcid.org/0000-0001-5204-1187>

36 Dr Beth Fylan, School of Pharmacy and Medical Sciences, University of Bradford, Richmond Road,  
37 Bradford, BD7 1DP, UK. NIHR Yorkshire and Humber Patient Safety Translational Research Centre.  
38 Bradford Institute for Health Research, Temple Bank House, Bradford, BD9 6RJ, UK. Wolfson  
39 Centre for Applied Health Research, Bradford, UK. <https://orcid.org/0000-0003-0599-4537>

40 Dr Hanif Ismail, School of Pharmacy and Medical Sciences, University of Bradford, Richmond Road,  
41 Bradford, BD7 1DP, UK. Wolfson Centre for Applied Health Research, Bradford, UK.  
42 <https://orcid.org/0000-0002-7885-6648>

43 Dr Sarah Alderson, School of Medicine, Worsley Building, University of Leeds, Leeds LS2 9JT, UK.  
44 <https://orcid.org/0000-0002-5418-0495>

45 Professor Chris P Gale, Leeds Institute of Cardiovascular and Metabolic Medicine, University of  
46 Leeds, Leeds, UK. <https://orcid.org/0000-0003-4732-382X>

47 Professor Peter Gardner, School of Pharmacy and Medical Sciences, University of Bradford,  
48 Richmond Road, Bradford, BD7 1DP, UK. Wolfson Centre for Applied Health Research, Bradford,  
49 UK. <https://orcid.org/0000-0002-8799-0443>

50 Professor Amanda J Farrin, Clinical Trials Research Unit, Leeds Institute of Clinical Trials Research,  
51 University of Leeds, Leeds, LS2 9JT, UK. <http://orcid.org/0000-0002-2876-0584>



1  
2  
3 Professor David P Alldred, University of Leeds, School of Healthcare, Baines Wing, Leeds LS2 9DA,  
4 UK. NIHR Yorkshire and Humber Patient Safety Translational Research Centre. Bradford Institute  
5 for Health Research, Temple Bank House, Bradford, BD9 6RJ, UK. Wolfson Centre for Applied  
6 Health Research, Bradford, UK. <https://orcid.org/0000-0002-2525-4854>  
7

8 ISCOMAT Programme Management Team  
9

10 **Word count (excluding title page, abstract, references, figures and tables):** 3694  
11

12 **Key words:** Heart failure, Cardiology, Clinical trials, Statistics and Research Methods  
13  
14

## 15 ABSTRACT

16  
17  
18

19 **Introduction:** A key priority for the UK National Health Service (NHS) and patients is to ensure  
20 that medicines are used safely and effectively. However, medication changes are not always optimally  
21 communicated and implemented when patients transfer from hospital into community settings. Heart  
22 failure is a common reason for admission to hospital. Patients with heart failure have a high burden of  
23 morbidity, mortality and complex pharmacotherapeutic regimes. The Improving the Safety and  
24 Continuity Of Medicines management at Transitions of care (ISCOMAT) programme comprises a  
25 cluster randomised controlled trial which will test the effectiveness of a complex behavioural  
26 intervention aimed at improving medications management at the interface between hospitals discharge  
27 and community care. We will conduct a rigorous process evaluation to inform interpretation of the  
28 trial findings, inform implementation of the intervention on a wider scale and aid dissemination of the  
29 intervention.  
30  
31  
32  
33  
34  
35

36  
37 **Methods and analysis:** The process evaluation will be conducted in six purposively selected  
38 intervention sites (i.e. hospital trusts and associated community pharmacies) using a mixed-methods  
39 design. Fidelity and barriers/enablers of implementation of the Medicines at Transitions Intervention  
40 (MaTI) will be explored using observation, interviews (20 patients, 40 healthcare professionals),  
41 surveys and routine trial data collection on adherence to MaTI. A parallel mixed analysis will be  
42 applied. Qualitative data will be thematically analysed using Framework analysis and survey data will  
43 be analysed descriptively. Data will be synthesised, triangulated and mapped to the Consolidated  
44 Framework for Implementation Research (CFIR) where appropriate. The process evaluation  
45 commenced on June 2018 and is due to end on February 2021.  
46  
47  
48  
49  
50  
51

52 **Ethics and dissemination:** Approved by Research Ethics Committee and the UK Health  
53 Research Authority REC: 18/YH/0017 / IRAS: 231431. Findings will be disseminated via academic  
54 and policy conferences, peer-reviewed publications and social media.  
55  
56  
57

58 **Trial registration number:** ISRCTN: 66212970/  
59  
60

## ARTICLE SUMMARY

### Strengths and limitations of this study

- An evaluation of a cluster randomised controlled trial of a complex behavioural intervention for a high priority healthcare issue.
- Views of patients and health professionals working across both primary and secondary care.
- A key strength is our mixed methods and the flexibility of our approach in light of emerging issues from the study and the shifts in healthcare practice and policy.
- The process evaluation is limited to six purposively selected intervention sites.

### INTRODUCTION

Heart failure presents a major challenge to healthcare systems globally.[1] In the UK it is thought to affect the lives of over 920,000 people.[2] In a study of four million individuals, heart failure cases have been found to increase 12% from 2002 to 2014.[3] Myocardial infarction has been identified as a risk for heart failure.[4] Heart failure is treated by a combination of medication, lifestyle changes and interventional surgery depending on the severity of the condition. Typically, the pharmacological treatment pathway involves a combination of medicines that are titrated to the optimal level that patients can tolerate. If not managed well (or if the patient has not been diagnosed and treated in primary care) they may be admitted to hospital for treatment and to be stabilised. Approximately 5% of all emergency hospital admissions are for heart failure.[5] Ongoing treatment plans following discharge from hospital may not be fully implemented due to failures in communication between healthcare providers or a lack of specialist staff in the community.[6, 7] Patients may not understand their medicines, what they are for and why they need to take them because, for example, medical language may create a gap in patients' understanding.[8] Patients may therefore deteriorate, which can result in a re-admission to hospital or death.[9]

### The ISCOMAT study

ISCOMAT is a five-year National Institute for Health Research (NIHR) funded research programme, which aims to optimise the way heart failure patients are supported with their medicines when they move from hospital to home. This may contribute to improving patients' health through helping them better understand and use their medicines. ISCOMAT also aims to improve the way health professionals work together in order to improve communication and optimise medicines use when patients return home. Similar international studies have examined patient-centred care transitions for patients hospitalized for heart failure and found clinical outcomes did not improve. ISCOMAT is designed for the UK health system and may show improvements in clinical outcomes in this setting.[10] In earlier work packages, we explored the resilience of the medicines management

1  
2  
3 pathway for heart failure and then used Experienced Based Co-Design to develop the Medicines at  
4 Transitions Intervention (MaTI) with patients and professionals.[8, 11] The MaTI was designed to  
5 make best use of medicines and reduce harm through: the provision of information to the patient;  
6 enhanced communication between hospital and the patient's community pharmacist; and increased  
7 engagement of the community pharmacist post discharge. We have provided limited information  
8 about the intervention here to avoid potential contamination of the ongoing trial. A more detailed  
9 description of the MaTI intervention will be published alongside feasibility testing. The cluster  
10 randomised controlled trial is testing the effectiveness of the MaTI. Patients will be recruited from  
11 cardiology wards in 42 acute NHS trusts across England, over approximately 12 months. The  
12 recruitment target is 50 patients from each cardiology ward (target n=2100 patients in total). Sites are  
13 randomised to either treatment as usual or to the MaTI. A site co-ordinator is responsible for  
14 organising the trial and implementation of the MaTI at each site.

### 23 **The process evaluation**

24 Process evaluations are increasingly carried out alongside randomised controlled trials.[12, 13] They  
25 are particularly well suited to trials of complex interventions in multiple sites where the intervention  
26 may be implemented differently throughout sites and help us to understand more about the practical  
27 problems encountered and how they were resolved. We will follow the Medical Research Council  
28 (MRC) recommendations and guidance on process evaluations.[13] The process evaluation will  
29 examine the effect of organisational context and setting on intervention delivery, and how the  
30 intervention is best implemented. There are no predefined methods that a process evaluation must  
31 adopt although they typically involve mixed methods.[14, 15] Although the process and outcomes  
32 evaluation will be conducted by separate teams, the trial and process evaluation teams will meet  
33 regularly to have oversight.

#### 40 Aims and objectives

41 The aims of the process evaluation are to inform interpretation of the trial findings, inform  
42 implementation of the intervention on a wider scale (for example, other long term conditions) and aid  
43 potential future implementation of the intervention.

44 Our objectives at each of the six process evaluation sites are to:

- 45 • Determine the degree to which the intervention is delivered (internal fidelity)
- 46 • Explore and explain the relationship between intervention implementation and the trial  
47 outcomes
- 48 • Identify barriers and facilitators for the successful implementation and roll out of the  
49 intervention (should the intervention be effective)

## PROCESS EVALUATION METHODS

### Study design

In addition to the aforementioned MRC guidance,[13] we will draw on other relevant literature,[16, 17] in particular the Consolidated Framework for Implementation Research (CFIR).[18] The CFIR is a conceptual framework that was developed to guide systematic assessment of multilevel implementation contexts to identify factors that might influence intervention implementation and effectiveness.[19] The MaTI intervention is implemented at multiple levels at each site including trusts, secondary and primary health care professionals and patients. The CFIR framework generates a knowledge base for implementation across multiple settings within five major domains: intervention characteristics, inner setting, outer setting, individual characteristics, and implementation process. Domains will be explored and additional relevant theoretical frameworks applied as appropriate. We will also draw on human resource management evaluation, specifically the ability, motivation and opportunity (AMO) model,[20, 21] and capability, opportunity, and motivation (COM-B) model.[22] These models are complementary and highlight how policy interventions that require changes in staff behaviour are shaped by their ability to work in different ways, in terms of skills, their level of motivation and their opportunities to change practice.

The study design is a parallel mixed synthesis study using quantitative and qualitative data from six intervention sites of the total 42 sites in the cluster randomised controlled trial. Methods will involve non-participant observations, semi-structured interviews and surveys. In order to capture data on barriers and facilitators to implementation we will collect data from health professionals working along the patient pathway (from both secondary and primary care), patients and community pharmacists. We will also utilise fidelity data on adherence to MaTI that is being collected within each intervention site in the trial. We will explore and explain the relationship between intervention implementation and the trial outcomes in the six process evaluation sites through analysing secondary outcome data. These data will indicate whether the intervention improves patient understanding of their medicines and satisfaction with medicines-related care at two and six weeks post-discharge and twelve months post-registration from the Patient Experience Survey (PES) (a validated item from Coleman's transition measure [23]), alongside observations and implementation data collected as part of the process evaluation. Process evaluations need to be flexible in the context of the ongoing trials they are evaluating and we will record and describe adaptations to this protocol when the findings are published.

### Sampling and recruitment

We aim to purposively sample six intervention sites based on the following criteria:

- University and non-university hospitals

- Method for transferring medicines discharge information to community pharmacists' e.g. electronic system, post, telephone
- Sites located across different geographic areas of England

Within each of the six selected sites we will recruit patients and staff for interviews and surveys. We will also conduct observations at each of these sites. The sampling approach will be iterative and following sampling of one-to-two pilot sites; consideration of the initial data in relation to fidelity will be made.

#### Patient interviews

Twenty patients in total will be sampled for interviews (three to four patients across each of the six sites). We will adopt a purposive sampling strategy to meet our target characteristics in terms of gender, age, length of diagnosis, and fidelity to intervention. After piloting, we may need to modify our approach to enable diversity in relation to our sampling criteria. Patients approached will be those that have participated in the trial and received the MaTI intervention.

#### Observations of intervention wards

We will seek permission to conduct non-participant observations of staff at ward level (two and a half hours per site). Staff members will be provided with information sheets and a script for informing patients of the researchers' presence. A maximum of two researchers will be present at any one time. Staff will have the opportunity to opt out of the observation. A potential limitation of conducting overt observation is the Hawthorne effect by which individuals being observed may alter their behaviour because they are aware that they are being studied.[24] We will seek to minimise the impact by informing staff that they are being observed and we wish them to behave as normal.[25]

#### Hospital staff interviews and surveys

Thirty hospital staff across six sites will be interviewed. Staff members will include those involved in delivering MaTI, such as heart failure specialist nurses, ward pharmacists, pharmacy technicians, cardiology ward nurses and site co-ordinators. We will identify and recruit secondary care staff through a combination of two approaches: (i) we will use information obtained during our ward observations about staff roles in delivering the intervention and approach staff directly; and (ii) we will also liaise with the appointed site co-ordinator to identify staff that are directly involved in the delivery of MaTI.

We will recruit hospital staff for surveys, aiming to recruit as many staff as possible involved in delivering MaTI. We will identify hospital staff with assistance from the site coordinators and seek informed consent from all staff.

## Community pharmacist interviews and surveys

We will identify and recruit ten community pharmacists for interviews. Community pharmacists contacted through nominated pharmacies in each of the six sites will be interviewed. We will identify through the following two methods: the patient checklist forms (collected by the trials unit) containing details of the pharmacy used by patients in the trial; directly contacting and inviting community pharmacists to participate.

Surveys will be undertaken with community pharmacists involved in delivering the intervention. The number of surveys returned will be dependent on the number of differing community pharmacies patients have used as well as return rates. We will identify community pharmacists for surveys through the methods highlighted above for interviews.

## Community heart failure nurse surveys

We will recruit up to five community heart failure nurses in each of the six evaluation clusters to complete surveys. A maximum of 30 surveys will be conducted in total. Community heart failure nurses will be identified through referrals made to the community heart failure services from the hospitals.

For all interviews and surveys, participants will be provided with an information sheet and informed, written consent will be obtained.

## Data collection

### Patient interviews

Semi-structured interviews with patients will be undertaken in patients' homes three months post-registration into the trial and will last approximately 45 minutes. Interviews, with patients and staff, will be audio recorded and transcribed verbatim. (This protocol was agreed prior to Covid-19. Data collection methods are being altered in response to the pandemic. For example, recent interviews are being conducted via phone. Our flexible approach to the protocol has facilitated these changes. Changes in methods will be tracked and reported as per pragmatic study development). In the first site, patient data will be collected in a block of three to four relatively early in the implementation of the intervention (in the first three months). In subsequent sites, we may sample during middle and late phases of implementation which will be determined based on the data collected. As the trial progresses, we will become more familiar with how the intervention is being implemented. Interview schedules will include a range of questions, probes and prompts and will explore patient experiences of the intervention components.

### Observations of intervention wards

1  
2  
3 Two researchers (CP/HI) will conduct unstructured and structured observations of clinical staff (heart  
4 failure nurses, cardiology nurses, cardiology pharmacists) of adherence to the intervention (content,  
5 coverage, frequency and duration). These observations will take place in hospital six months post-  
6 registration of the first patient recruited at that site, focusing in-depth on the discharge process and  
7 introduction of the MaTI toolkit. Observations will be two and a half hours per site designed to  
8 capture not only delivery of the MaTI (structured) but also to augment our understanding of the  
9 hospital ward culture and environment (unstructured). Focused and general observation data will be  
10 collected through the use of a designed structured observation tool and field notes.

11  
12  
13  
14  
15  
16 The focus of the observations will be on the interaction between staff and patients, particularly around  
17 the discharge process and completion/use of the toolkit. Other aspects of the intervention e.g. transfer  
18 of information, time spent with patients and level of patient understanding will be observed if  
19 possible. We will collect quantitative data using structured observations to record actions or  
20 behaviours, for example, how information was introduced and provided to patients. The structured  
21 observation may pose a greater challenge to collect as it will not be possible to identify in advance  
22 when MaTI related activities, such as the introduction of the toolkit, will occur. The two-and-a-half-  
23 hour period of observation will be discontinuous. We will wait at the site until relevant activity  
24 occurs, and we will liaise with staff within the site to help us identify suitable times to conduct this  
25 structured observation. Staff will help us identify when the intervention related activity is likely to  
26 occur. In the unstructured observations we will seek to develop a more general understanding of the  
27 ward culture and the ways the staff interact with patients and each other in the delivery of care.  
28 Unstructured data will be collated through field notes.

### 29 30 31 32 33 34 35 36 37 38 Hospital staff interviews and surveys

39  
40 Semi-structured interviews with hospital staff will be conducted using an interview schedule covering  
41 staff experiences in delivering the intervention. These will take place at the hospital and at the end of  
42 site trial implementation i.e. two weeks post-discharge of the last recruited patient to avoid  
43 influencing intervention implementation during the trial. Survey data will be collected through paper  
44 questionnaires provided to staff when visiting the hospital at the end of site implementation. A  
45 maximum 180 surveys will be conducted.

### 46 47 48 49 50 51 52 Community pharmacist interviews and surveys

53  
54 Community pharmacy semi-structured interviews will focus on how the pharmacists interacted with  
55 the enhanced communication from the hospital and how they engaged with patients post-discharge.  
56 An interview schedule will be used to collect data on the interventions perceived usability and impact.  
57 These will take place at the end of site implementation i.e. two months post-discharge of the last  
58 recruited patient. Interviews may take place face to face or via phone. Survey data will be collected  
59  
60

through questionnaires to staff via post once the intervention has finished at that site. A maximum 300 surveys will be conducted.

### Community heart failure nurse surveys

Community heart failure nurses will be invited to complete postal surveys at the end of site implementation. A maximum 30 surveys will be conducted. We do not plan to interview community heart failure nurses because our primary focus is those delivering the intervention i.e. hospital staff and community pharmacists. However, the survey data will explore whether nurses used the toolkit with patients in the community, whether the toolkit enhanced patient care and whether nurses would advocate the use of the toolkit to support patient treatment. Table 1 illustrates the timing of all data collection.

**Table 1 Data collection across six process evaluation sites\***

| Interview Patient                             | Interview Hospital staff            | Interview Community Pharmacists      | Focused and general observations | Survey hospital staff                                                                  | Survey Community Pharmacists                                                              | Survey Community Heart Failure Nurses                                                  |
|-----------------------------------------------|-------------------------------------|--------------------------------------|----------------------------------|----------------------------------------------------------------------------------------|-------------------------------------------------------------------------------------------|----------------------------------------------------------------------------------------|
| 20 in total                                   | 30 in total                         | 10 in total                          | 2.5 hours                        | 180 max. Sampling frame is all hospital staff involved in delivery of the intervention | 300 max. Sampling frame is all community pharmacists that have delivered the intervention | 30 max. Sampling frame is all community heart failure nurses associated with each site |
| 3 months post patient registration into trial | 2 weeks post discharge last patient | 2 months post discharge last patient | 6 months post implementation     | 2 weeks post discharge last patient                                                    | 2 months post discharge last patient                                                      | 2 months post discharge last patient                                                   |

\* Within each site, data collection will be sequential. Across the six sites, data collection will be non-sequential as it will depend on recruitment rates at each site.

### Analysis

The qualitative analysis will be undertaken using a two-step process:

#### Step 1 Framework analysis

The process of interpreting the transcripts will take place whilst interviews are still being conducted.

This will give the research team the opportunity to explore emerging themes in detail in subsequent



1  
2  
3 interviews. The interviews and unstructured observations will be analysed using the Framework  
4 approach, which involves detailed familiarisation with the data, identifying key themes, interpreting  
5 the findings within the context of similar research studies, and considering policy and practice.[26]  
6  
7 The emerging analysis will be thematic and iterative with regular discussions taking place with the  
8 process evaluation team. This involvement will support our interpretation of the interview data. The  
9 analysis will be theoretically informed by COM-B[22] and AMO.[20-22]  
10  
11  
12

### 13 Step 2 Consolidated Framework for Implementation Research (CFIR)

14  
15 Following initial theme generation, we will review the data using the Consolidated Framework for  
16 Implementation Research (CFIR).[18] The analysis will involve mapping barriers and facilitators onto  
17 domains within CFIR.  
18  
19

20  
21 Quantitative data will include survey, structured observations and data on adherence to the  
22 intervention. The survey data will be entered into secure databases. Descriptive statistics will be  
23 employed to analyse survey data. Data relating to adherence to MaTI is being collected from all  
24 intervention sites. This consists of checklists detailing which components of the intervention were  
25 implemented for each patient. We will use these data to inform and explain the findings in the process  
26 evaluation sites.  
27  
28  
29

### 30 Additional data

31  
32 Where appropriate, we may consider using the additional data (collected for all sites as part of the  
33 wider trial) to inform, explain and triangulate findings with the process evaluation. For example, we  
34 may decide that we need more structured information on completion of the MaTI checklist to consider  
35 alongside our staff interviews and so clarify which steps of the MaTI different staff members carried  
36 out.  
37  
38  
39  
40  
41

42 Additional data sources include:

- 43 • Site Feasibility Questionnaire (initial questions sent to sites to assess their suitability to take  
44 part in the trial covering areas such as clinical pathways, staffing levels/ types of specialist staff,  
45 communication with community pharmacy and the number of patients)
- 46 • Patient Experience Survey (completed by patients at two weeks/ six weeks/ twelve months  
47 post discharge)
- 48 • MaTI checklist completed in the hospital (monitors adherence to the main components of the  
49 intervention)
- 50  
51  
52  
53  
54  
55  
56  
57  
58  
59  
60

1  
2  
3 • National Heart Failure Audit Data[27] (reports on the characteristics of patients admitted with  
4 acute or sub-acute heart failure, in-hospital investigations and care, treatment given and the discharge  
5 planning and follow-up)  
6

7  
8 • Community pharmacy data collection form (describes implementation within community  
9 pharmacy)  
10

11  
12 Analysis will be integrative in order to clarify and explain the predominant systems and their  
13 implications; qualitative and quantitative data will be consolidated through a process of 'parallel  
14 mixed analysis'. [28] This includes an independent analysis of the quantitative and qualitative data to  
15 provide an understanding of key phenomena and the two understandings will be integrated using  
16 meta-inferences. For example, key findings will be generated iteratively, explicitly supported by  
17 quantitative data (such as structured observational and survey data) and substantiated or augmented by  
18 thematic qualitative data (such as interview data and field notes), and vice-versa. Survey data will be  
19 compared across the six clusters to identify any differences in staff perceptions of the barriers and  
20 facilitators to delivery. Analysis will be descriptive.  
21

22  
23 The combined analysis will therefore meet our key aims to inform interpretation of the trial findings,  
24 inform implementation of the intervention on a wider scale (for example, other long-term conditions)  
25 and aid potential future implementation of the intervention. This will be achieved by providing an in  
26 depth understanding of the overall implementation, mechanisms of impact and external factors (infra  
27 structure) that may influence delivery and functioning of the intervention.  
28

### 29 Patient and public involvement

30  
31 The ISCOMAT study has a patient-led steering group that is involved in all stages of the research  
32 process, including the process evaluation. Due to the process evaluation's iterative design we will  
33 regularly consult with the group via meetings and phone/email. The group will continue to be  
34 consulted on the research design, questions, outcome measures and findings. In particular the  
35 members of the group contribute to reviews and evaluations, as well as reading and considering study  
36 and consultation documents from a patient perspective. The group's expertise through their  
37 experiences of living with heart failure will be crucial in understanding patients' experiences with the  
38 MaTI intervention in particular.  
39

## 40 **ETHICS AND DISSEMINATION**

41  
42 The process evaluation has been approved as part of the ISCOMAT trial by the Research Ethics  
43 Committee and the UK Health Research Authority REC: 18/YH/0017 / IRAS: 231431.  
44  
45  
46  
47  
48  
49  
50  
51  
52

1  
2  
3 Findings will be disseminated via academic and policy conferences, peer reviewed publications,  
4 social media e.g. Twitter, with further avenues for dissemination to be agreed upon with our patient  
5 led steering group.  
6  
7  
8  
9

## 10 **CONCLUSION**

11 In this paper we have described the design and methods for the mixed-methods process evaluation of  
12 the NIHR funded ISCOMAT cluster randomised controlled trial which will test the effectiveness of a  
13 complex behavioural intervention aimed at improving medications management at the interface  
14 between hospital and community for patients with hospitalised with heart failure. This process  
15 evaluation protocol demonstrates the importance of process evaluations for understanding outcomes  
16 in the clinical trial, as well as providing guidance for future process evaluations. We have followed  
17 the Medical Research Council (MRC) recommendations and guidance on the delivery of process  
18 evaluation[13] in order to support the standardisation of process evaluations.  
19  
20  
21  
22  
23

## 24 **Acknowledgements**

25  
26 We would like to thank Alison Blenkinsopp, Gerry Armitage, Lauren Moureau, Jan Speechley, the  
27 ISCOMAT Patient-led Steering Group, the ISCOMAT Trial Management Group, Trial Steering  
28 Committee and the Programme Steering Committee.  
29  
30  
31

## 32 **Competing interests statement**

33  
34 The authors are not aware of any competing interests.  
35  
36

## 37 **Funding**

38  
39 This study is funded by the National Institute for Health Research (NIHR) [Programme Grants for  
40 Applied Research (Grant Reference Number RP-PG-0514-20009)].  
41  
42

## 43 **Disclaimer**

44  
45 The views expressed are those of the authors and not necessarily those of the NIHR or the Department  
46 of Health and Social Care.  
47  
48

## 49 **Authors' contributions**

50  
51 CP, LB, BF, HI, SA, CPG, PG, AF and DPA developed the detail of the process evaluation protocol.  
52 CP drafted the manuscript and all authors reviewed it critically for intellectual content and approved  
53 the final version submitted for publication.  
54  
55

56  
57 Our collaborators include members of the wider ISCOMAT Programme Management Team who  
58 contributed to previous work packages and the ongoing programme including: Jon Silcock, David K.  
59  
60

1  
2  
3 Raynor, Robert Turner, John Wright, Ian Kellar, Roberta Longo, Ivana Holloway, Chris Bojke, Leeds  
4 Clinical Trials Research Unit.  
5  
6  
7  
8

## 9 REFERENCES

- 10 1. Dewan P, Rørth R, Jhund PS, et al. Income inequality and outcomes in heart failure: a global  
11 between-country analysis. *JACC: Heart Failure*. 2019;7(4):336-46.doi:10.1016/j.jchf.2018.11.005
- 12 2. British Heart Foundation. UK Factsheet 2020 [Available from: [https://www.bhf.org.uk/what-](https://www.bhf.org.uk/what-we-do/our-research/heart-statistics)  
13 [we-do/our-research/heart-statistics](https://www.bhf.org.uk/what-we-do/our-research/heart-statistics). Date accessed 14/04/2020
- 14 3. Conrad N, Judge A, Tran J, et al. Temporal trends and patterns in heart failure incidence: a  
15 population-based study of 4 million individuals. *The Lancet*. 2018;391(10120):572-  
16 80.doi:10.1016/S0140-6736(17)32520-5
- 17 4. Gho JMIH, Schmidt AF, Pasea L, et al. An electronic health records cohort study on heart  
18 failure following myocardial infarction in England: incidence and predictors. *BMJ open*.  
19 2018;8(3):e018331.doi: 10.1136/bmjopen-2017-018331
- 20 5. National Institute for Health and Social Care Excellence. Chronic heart failure in adults:  
21 diagnosis and management NICE guideline [NG106] 2018 [Available from:  
22 <https://www.nice.org.uk/guidance/ng106>. Date accessed 14/04/2020
- 23 6. Phipps DL, Morris RL, Blakeman T, et al. What is involved in medicines management across  
24 care boundaries? A qualitative study of healthcare practitioners' experiences in the case of acute  
25 kidney injury. *BMJ open*. 2017;7(1):e011765.doi: 10.1136/bmjopen-2016-011765
- 26 7. Urban R, Paloumpi E, Rana N, et al. Communicating medication changes to community  
27 pharmacy post-discharge: the good, the bad, and the improvements. *Int J Clin Phar*. 2013;35(5):813-  
28 20.doi: 10.1007/s11096-013-9813-9
- 29 8. Fylan B, Marques I, Ismail H, et al. Gaps, traps, bridges and props: a mixed-methods study of  
30 resilience in the medicines management system for patients with heart failure at hospital discharge.  
31 *BMJ Open*. 2019;9(2):e023440.10.1136/bmjopen-2018-023440
- 32 9. Inamdar AA, Inamdar AC. Heart failure: diagnosis, management and utilization. *Journal of*  
33 *clinical medicine*. 2016;5(7):62.doi: 10.3390/jcm5070062
- 34 10. Van Spall HGC, Lee SF, Xie F, et al. Effect of patient-centered transitional care services on  
35 clinical outcomes in patients hospitalized for heart failure: the PACT-HF randomized clinical trial.  
36 *Jama*. 2019;321(8):753-61.doi: 10.1001/jama.2019.0710
- 37 11. Raynor DK, Ismail H, Blenkinsopp A, et al. Experience-based co-design—Adapting the  
38 method for a researcher-initiated study in a multi-site setting. *Health Expectations*.  
39 2020.doi:<https://doi.org/10.1111/hex.13028>
- 40 12. Ellard DR, Taylor SJC, Parsons S, et al. The OPERA trial: a protocol for the process evaluation  
41 of a randomised trial of an exercise intervention for older people in residential and nursing  
42 accommodation. *Trials*. 2011;12(1):28.doi: 10.1186/1745-6215-12-28
- 43 13. Moore GF, Audrey S, Barker M, et al. Process evaluation of complex interventions: Medical  
44 Research Council guidance. *British Medical Journal*.  
45 2015;350:h1258.doi:<https://doi.org/10.1136/bmj.h1258>
- 46 14. Mann C, Shaw A, Guthrie B, et al. Protocol for a process evaluation of a cluster randomised  
47 controlled trial to improve management of multimorbidity in general practice: the 3D study. *BMJ*  
48 *open*. 2016;6(5):e011260.doi:<http://dx.doi.org/10.1136/bmjopen-2016-011260>
- 49 15. Grant A, Treweek S, Dreischulte T, et al. Process evaluations for cluster-randomised trials of  
50 complex interventions: a proposed framework for design and reporting. *Trials*.  
51 2013;14(1):15.doi:<https://doi.org/10.1186/1745-6215-14-15>
- 52 16. Ellard DR, Thorogood M, Underwood M, et al. Whole home exercise intervention for  
53 depression in older care home residents (the OPERA study): a process evaluation. *BMC Med*.  
54 2014;12(1):1

17. Sheard L, O'Hara J, Armitage G, et al. Evaluating the PRASE patient safety intervention-a multi-centre, cluster trial with a qualitative process evaluation: study protocol for a randomised controlled trial. *Trials*. 2014;15(1):2282. doi:10.1186/1745-6215-15-420
18. Damschroder L, Aron D, Keith R, SR K, Alexander J, Lowery J. Fostering implementation of health services research findings into practice: a consolidated framework for advancing implementation science. *Implement Sci*. 2009;4:50
19. Keith RE, Crosson JC, O'Malley AS, et al. Using the Consolidated Framework for Implementation Research (CFIR) to produce actionable findings: a rapid-cycle evaluation approach to improving implementation. *Implementation Science*. 2017;12(1):15.doi:10.1186/s13012-017-0550-7
20. Macky K, Boxall P. The relationship between 'high-performance work practices' and employee attitudes: an investigation of additive and interaction effects. *The International Journal of Human Resource Management*. 2007;18(4):537-67.doi:10.1080/09585190601178745
21. Purcell J. Understanding the people and performance link: Unlocking the black box: CIPD Publishing; 2003.
22. Michie S, Van Stralen MM, West R. The behaviour change wheel: a new method for characterising and designing behaviour change interventions. *Implementation science*. 2011;6(1):42
23. Coleman EA, Mahoney E, Parry C. Assessing the quality of preparation for posthospital care from the patient's perspective: the care transitions measure. *Medical care*. 2005;246-55.doi:10.1097/00005650-200503000-00007
24. Roethlisberger F, Dickson W. *Management and the Worker* Cambridge, MA: Harvard University Press; 1939.
25. Campbell JP, Maxey VA, Watson WA. Hawthorne effect: implications for prehospital research. *Annals of emergency medicine*. 1995;26(5):590-4
26. Ritchie J, Lewis J, Nicholls CM, et al. *Qualitative research practice: A guide for social science students and researchers*: Sage; 2013.
27. National Institute for Cardiovascular Outcomes Research (NICOR). National Heart Failure Audit 2017/18 2017/18 [Available from: <https://www.nicor.org.uk/national-cardiac-audit-programme/heart-failure-heart-failure-audit/>. Date accessed 25/11/2019
28. Creswell JW, Clark VLP. *Designing and conducting mixed methods research*: Sage publications; 2017.

1  
2  
3  
4  
5  
6  
7  
8  
9  
10  
11  
12  
13  
14  
15  
16  
17  
18  
19  
20  
21  
22  
23  
24  
25  
26  
27  
28  
29  
30  
31  
32  
33  
34  
35  
36  
37  
38  
39  
40  
41  
42  
43  
44  
45  
46  
47  
48  
49  
50  
51  
52  
53  
54  
55  
56  
57  
58  
59  
60

### Medical Research Council process evaluation checklist[1]

| Checklist                                                                                                                                                   | Response                                           | Where in protocol?                                                              |
|-------------------------------------------------------------------------------------------------------------------------------------------------------------|----------------------------------------------------|---------------------------------------------------------------------------------|
| <b>Working with policy and practice stakeholders</b>                                                                                                        |                                                    |                                                                                 |
| 1. Are there any potential conflicts of interest arising from the relationship between evaluators and policy/practice stakeholders?                         | No                                                 | Page 12                                                                         |
| 2. Have the authors described how they will address these and ensure that the evaluation remains independent?                                               | N/A                                                | N/A                                                                             |
| 3. Does the proposal set out a clear plan for communicating findings to policy and practice stakeholders during the evaluation?                             | Yes                                                | Ethics and dissemination on page 11                                             |
| <b>Relationships between evaluation components</b>                                                                                                          |                                                    |                                                                                 |
| 4. Is the relationship between the process evaluation and other evaluation components clearly defined and justified?                                        | To an extent. More detail to come in results paper | 'The process evaluation' on page 4                                              |
| 5. Will process and outcomes evaluation be conducted by the same team or by separate teams?                                                                 | Separate teams                                     | 'The process evaluation' on page 4                                              |
| 6. If the former, how will researchers ensure that knowledge of outcomes or process does not bias analysis of the other?                                    | N/A                                                | N/A                                                                             |
| 7. If the latter, is there clear oversight of the two components?                                                                                           | Yes                                                | 'Process evaluation' on page 4 (regular meetings)                               |
| 8. Is it clear that the principal investigator values all aspects of the evaluation, and will provide effective oversight of all aspects of the evaluation? | Yes                                                | 'Process evaluation' on page 4 (regular meetings)                               |
| <b>Intervention description and theory</b>                                                                                                                  |                                                    |                                                                                 |
| 9. Is the intended intervention fully described?                                                                                                            | No                                                 | 'Study design' on page 5 indicates that we can only provide limited information |
| 10. Are standardised terminology and definitions of intervention components adopted where possible?                                                         | As above                                           | As above                                                                        |
| 11. Are the structures and processes involved in intervention delivery fully described?                                                                     | As above                                           | As above                                                                        |
| 12. If appropriate, will a full intervention manual be made publicly available?                                                                             | Yes if intervention is successful                  | N/A for protocol paper                                                          |
| 13. Is a clear, plausible, set of causal assumptions specified and justified (for example, in a logic model)?                                               | To be described in a separate paper                | N/A                                                                             |
| 14. Does this draw upon appropriate                                                                                                                         | Yes                                                | Page 5 'Study design' AMO, COM-B                                                |

|                                                                                                                                                                                                                              |     |                                                                                                             |
|------------------------------------------------------------------------------------------------------------------------------------------------------------------------------------------------------------------------------|-----|-------------------------------------------------------------------------------------------------------------|
| theories?                                                                                                                                                                                                                    |     | and CFIR                                                                                                    |
| 15. If not, are there plans to develop a theory as part of the research?                                                                                                                                                     | N/A | N/A                                                                                                         |
| 16. Have the authors planned to review these assumptions with policy and practice stakeholders to explore agreement and divergence on what the intervention is, and how it will work?                                        | Yes | Completed and discussed in another paper                                                                    |
| <b>Process evaluation aims and research questions</b>                                                                                                                                                                        |     |                                                                                                             |
| 17. Are the research questions clear, important and well justified with reference to the theory of the intervention and the status of the evidence base? What decisions will they inform?                                    | Yes | Research questions and objectives on page 4. Justified on page 3 in 'Introduction'.                         |
| 18. Have the authors considered whether previous process evaluations have been conducted of interventions involving similar components or theories of change?                                                                | Yes | Literature highlighted in 'Study design' on page 5                                                          |
| 19. Have they adopted comparable aims and methods, or justified not doing so?                                                                                                                                                | Yes | Methods outlined from page 5                                                                                |
| 20. Has the theory of the intervention (or logic model) been used to identify key areas of uncertainty for investigation by process evaluation?                                                                              | Yes | Yes CFIR AMO and COM-B will be included in data collection and analysis processes as highlighted on page 5  |
| 21. Have the authors considered which components may prove most challenging to implement (e.g. which represent more fundamental change, or for which there is least agreement on what they are and the purposes they serve)? | Yes | Detail to be provided in results paper                                                                      |
| 22. Have the authors considered for which causal assumptions evidence is most equivocal?                                                                                                                                     | Yes | To be reported in results paper                                                                             |
| 23. How will unanticipated consequences be captured?                                                                                                                                                                         | Yes | To be reported in results paper. Changes from protocol will be recorded in a table                          |
| 24. Is there linkage between research aims? Do they fit together to address the overall study aim?                                                                                                                           | Yes | Study aims to be found on page 4                                                                            |
| 25. If conducted alongside an outcomes evaluation, is the added value of the process evaluation explained? Is it clear how the research will enhance the interpretation of outcomes?                                         | Yes | Explained in 'Study design' page 5                                                                          |
| 26. Will process evaluation provide sufficient assurances regarding the internal validity of the outcomes                                                                                                                    | Yes | Examining data from the trial, e.g. Hospital (MaTI) checklist (monitors adherence to the main components of |

|                                                                                                                                                                                                    |                    |                                                                                                                    |
|----------------------------------------------------------------------------------------------------------------------------------------------------------------------------------------------------|--------------------|--------------------------------------------------------------------------------------------------------------------|
| evaluation?                                                                                                                                                                                        |                    | the intervention) Page 10                                                                                          |
| 27. Will it enable policymakers/practitioners to understand how the intervention might be applied in different contexts?                                                                           | N/A protocol paper | To be reported in results paper                                                                                    |
| 28. Have the authors stated how and when they will combine process and outcomes data?                                                                                                              | N/A protocol paper | To be reported in results paper                                                                                    |
| <b>Selection of methods to address research questions</b>                                                                                                                                          |                    |                                                                                                                    |
| 29. Are the quantitative and qualitative methods selected appropriate to the research questions?                                                                                                   | Yes                | Pages 5 to 11 discuss methods used. More detail will be provided in results paper                                  |
| 30. Will implementation be captured in sufficient detail to establish consistency with the theory of the intervention?                                                                             | N/A protocol paper | To be reported in results paper                                                                                    |
| 31. Are existing validated measures used where possible? Are plans to validate new measures included?                                                                                              | Yes                | Page 9 on framework analysis and CFIR                                                                              |
| 32. How will emerging changes, adaptations or additions to the intervention be captured?                                                                                                           | N/A protocol paper | N/A                                                                                                                |
| 33. Are the quantitative methods appropriate? (e.g. 'tick box' self-report by implementers of intervention delivery should be avoided if possible).                                                | Yes                | Page 6-11 we describe quantitative methods                                                                         |
| 34. Are the qualitative methods appropriate?                                                                                                                                                       | Yes                | Pages 6-11 we describe qualitative methods                                                                         |
| 35. Have the authors considered how change in practice as a result of being observed or measured will be minimised?                                                                                | Yes                | Page 6 on hawthorn effect                                                                                          |
| 36. Have the authors considered the timing of data collection, and its impact on the data collected?                                                                                               | Yes                | Page 8-9 on timing of data collection                                                                              |
| 37. Have the authors investigated whether any routine programme monitoring data can be used? If so, are there plans to check their validity and reliability?                                       | Yes                | Interviews will explore routine data such as MaTI checklists to explain if there are poor quality results. Page 11 |
| 38. Have the authors stated how quantitative and qualitative methods will be combined?                                                                                                             | Yes                | Page 10-11 Greater detail will be given in results paper                                                           |
| 39. Have the authors considered how they will respond if challenges emerge during the evaluation - for example, if serious implementation failures are identified which need deeper investigation? | Yes                | We describe possible challenges carrying out observations and how this will be addressed. Page 6                   |
| <b>Resource considerations in collecting/analysing process data</b>                                                                                                                                |                    |                                                                                                                    |
| 40. Who will lead or conduct the process evaluation? Do they have,                                                                                                                                 | Yes                | The lead is named on the paper                                                                                     |



|                                                                                                                                                                                                                                                    |     |                                                                                                                       |
|----------------------------------------------------------------------------------------------------------------------------------------------------------------------------------------------------------------------------------------------------|-----|-----------------------------------------------------------------------------------------------------------------------|
| or have direct access to, appropriate expertise and experience?                                                                                                                                                                                    |     |                                                                                                                       |
| 41. Does the research team have sufficient expertise in quantitative and qualitative methods and relevant social science theory?                                                                                                                   | Yes | N/A                                                                                                                   |
| 42. Is sufficient time, funding and staff resource included for data collection, analysis (including sufficient time to conduct good quality analysis of qualitative data, with quality checks by a second coder where appropriate) and reporting? | Yes | Considered regularly at meetings                                                                                      |
| <b>Analysis and reporting</b>                                                                                                                                                                                                                      |     |                                                                                                                       |
| 43. Has consideration been given to the use of quantitative process measures for modelling variations in outcomes and/or cost-effectiveness?                                                                                                       | Yes | Separate cost evaluation is being conducted                                                                           |
| 44. Is the relationship between qualitative data components and outcomes and/or cost effectiveness analysis clear?                                                                                                                                 | Yes | Relationship between qualitative data and outcomes discussed on page 11. Separate cost evaluation is being conducted. |
| 45. Is there a coherent strategy for dissemination to an academic audience and wider stakeholders?                                                                                                                                                 | Yes | Page 11. Discussed at regular meeting.                                                                                |

1. Moore GF, Audrey S, Barker M, et al. Process evaluation of complex interventions: Medical Research Council guidance. *British Medical Journal*. 2015;350:h1258.doi:https://doi.org/10.1136/bmj.h1258
